# Supplementary material for: Comparing the transport-limited and ξ – q models for sediment transport
Source: Copernicus journal article supplement (doi:10.5194/esurf-10-301-2022), 2022-04-04
Supplement: Supplementary file 1 [file esurf-10-301-2022-supplement.pdf]

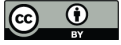

*Supplement of*

## **Comparing the transport-limited and $\xi$ - $q$ models for sediment transport**

**Jean Braun**

*Correspondence to:* Jean Braun ([jbraun@gfz-potsdam.de](mailto:jbraun@gfz-potsdam.de))

The copyright of individual parts of the supplement might differ from the article licence.

## Supplementary Material

### **Response to instantaneous variations in incoming sedimentary flux and relative precipitation rate.**

In the following figures, we show the response of the system to:

1. a step decrease in the incoming sedimentary flux (Figure S1);
2. an increase in relative precipitation rate (Figure S2);
3. and, a decrease in relative precipitation rate(Figure S3)

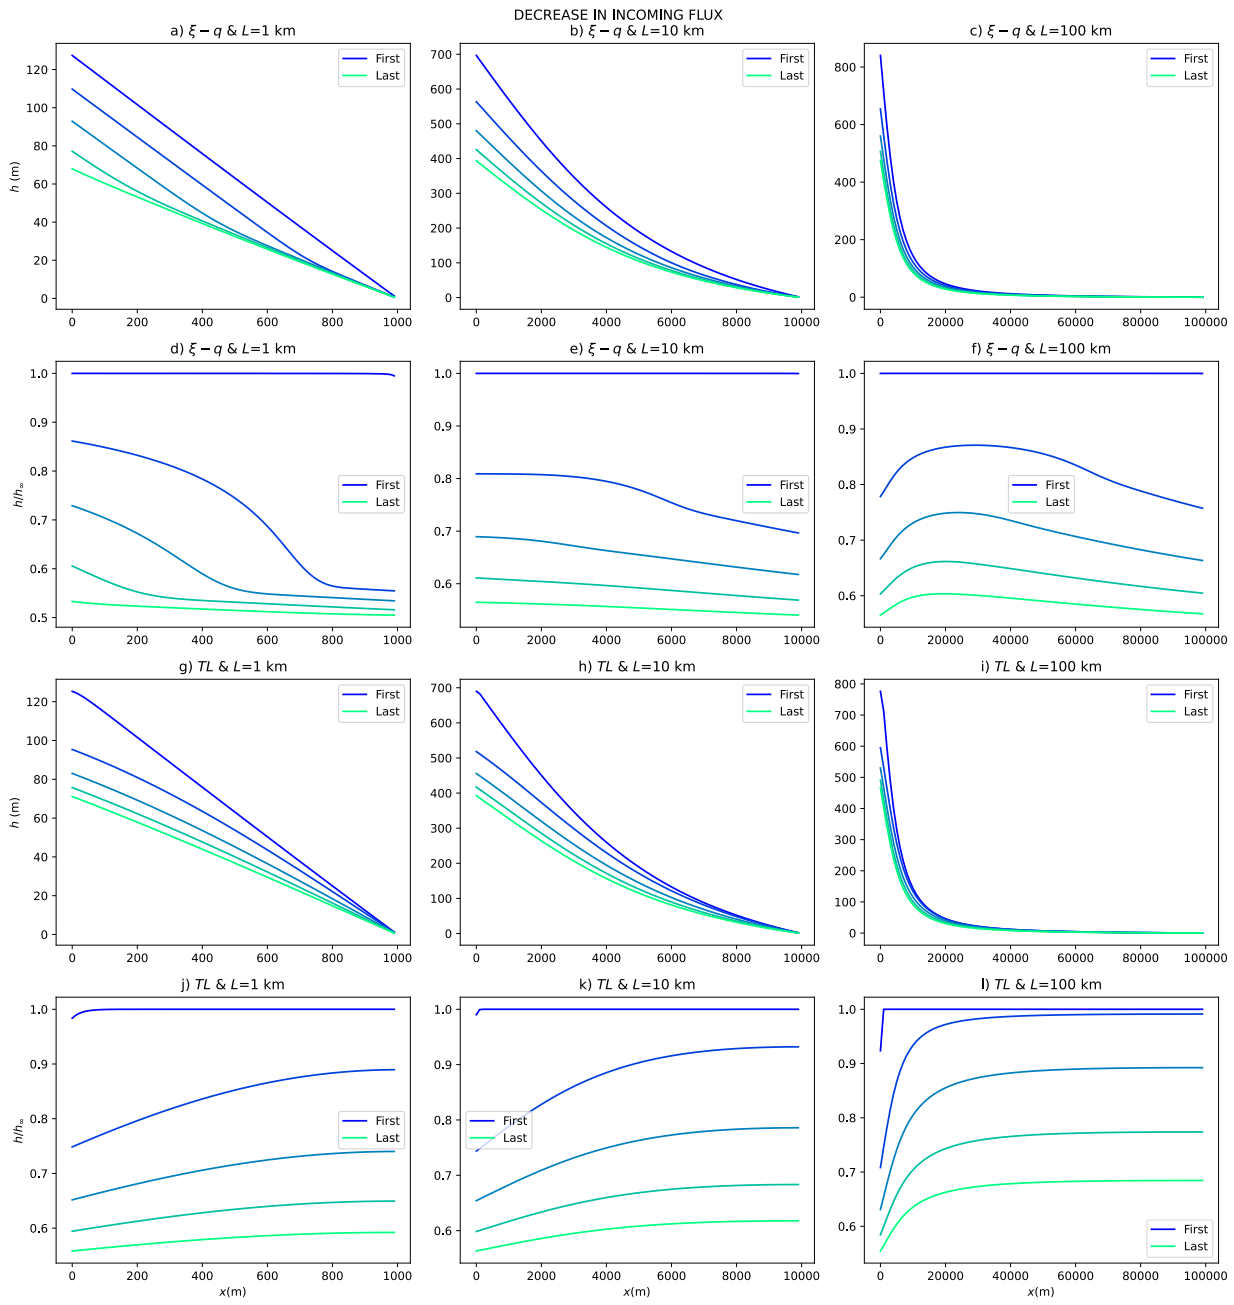

Figure S1: Same as Figure 9 but for a decrease in incoming sedimentary flux by a factor of 2.

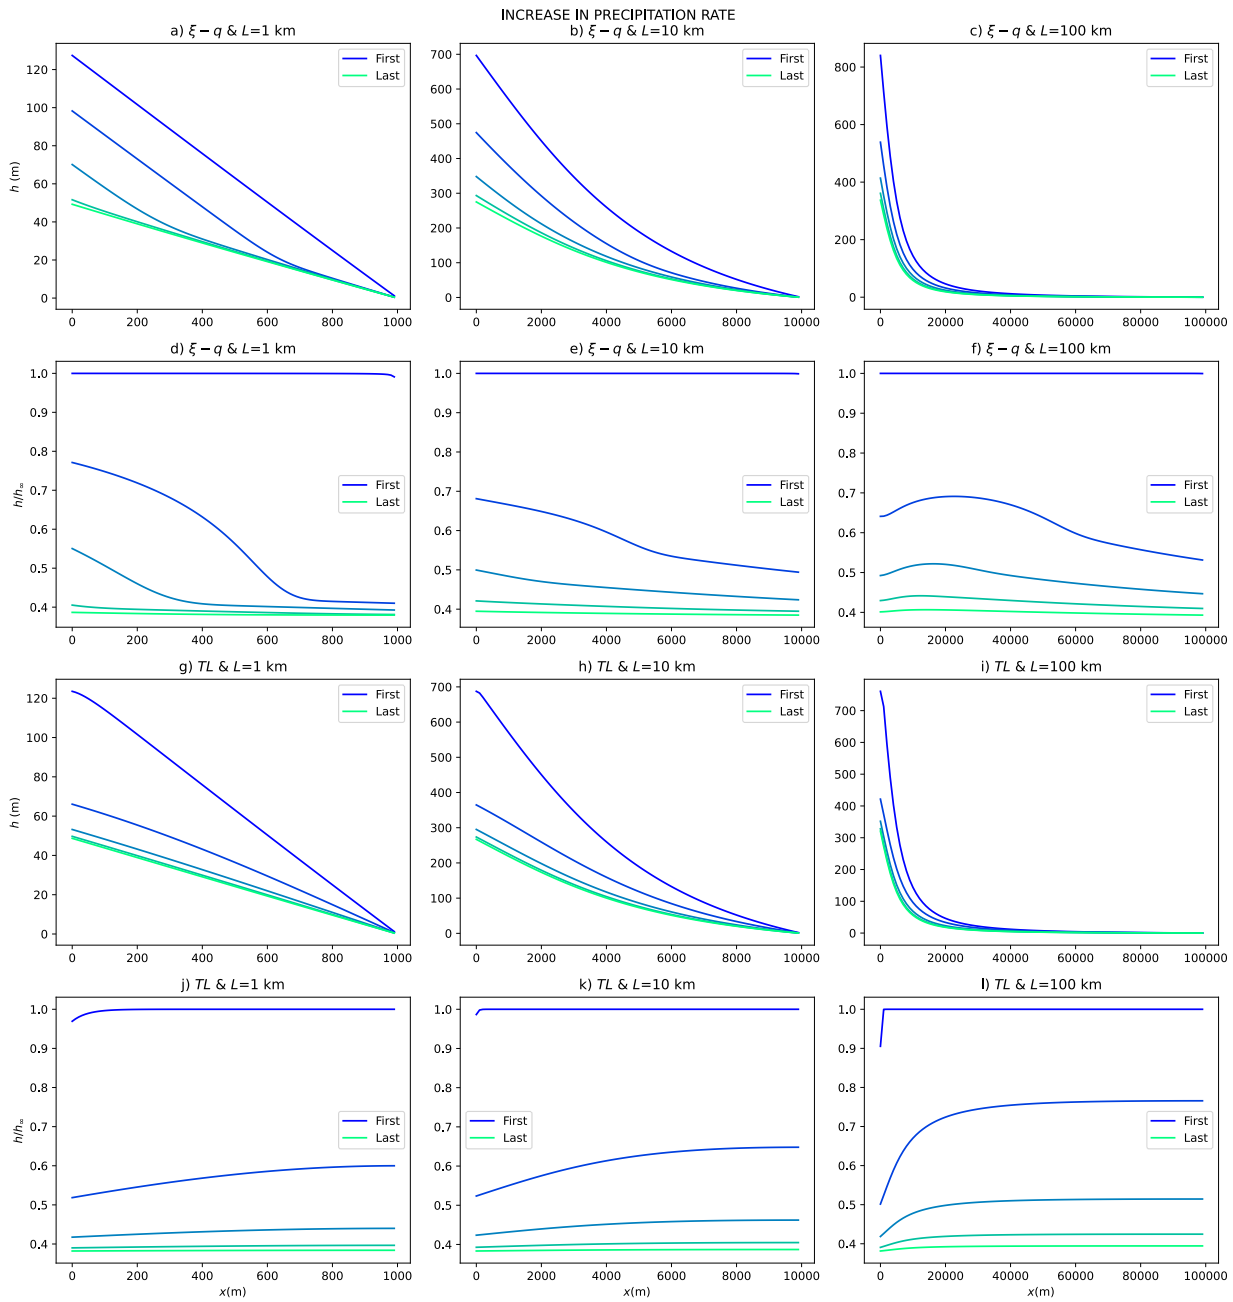

Figure S2: Same as Figure 9 but for an increase in relative precipitation rate by a factor of 2.

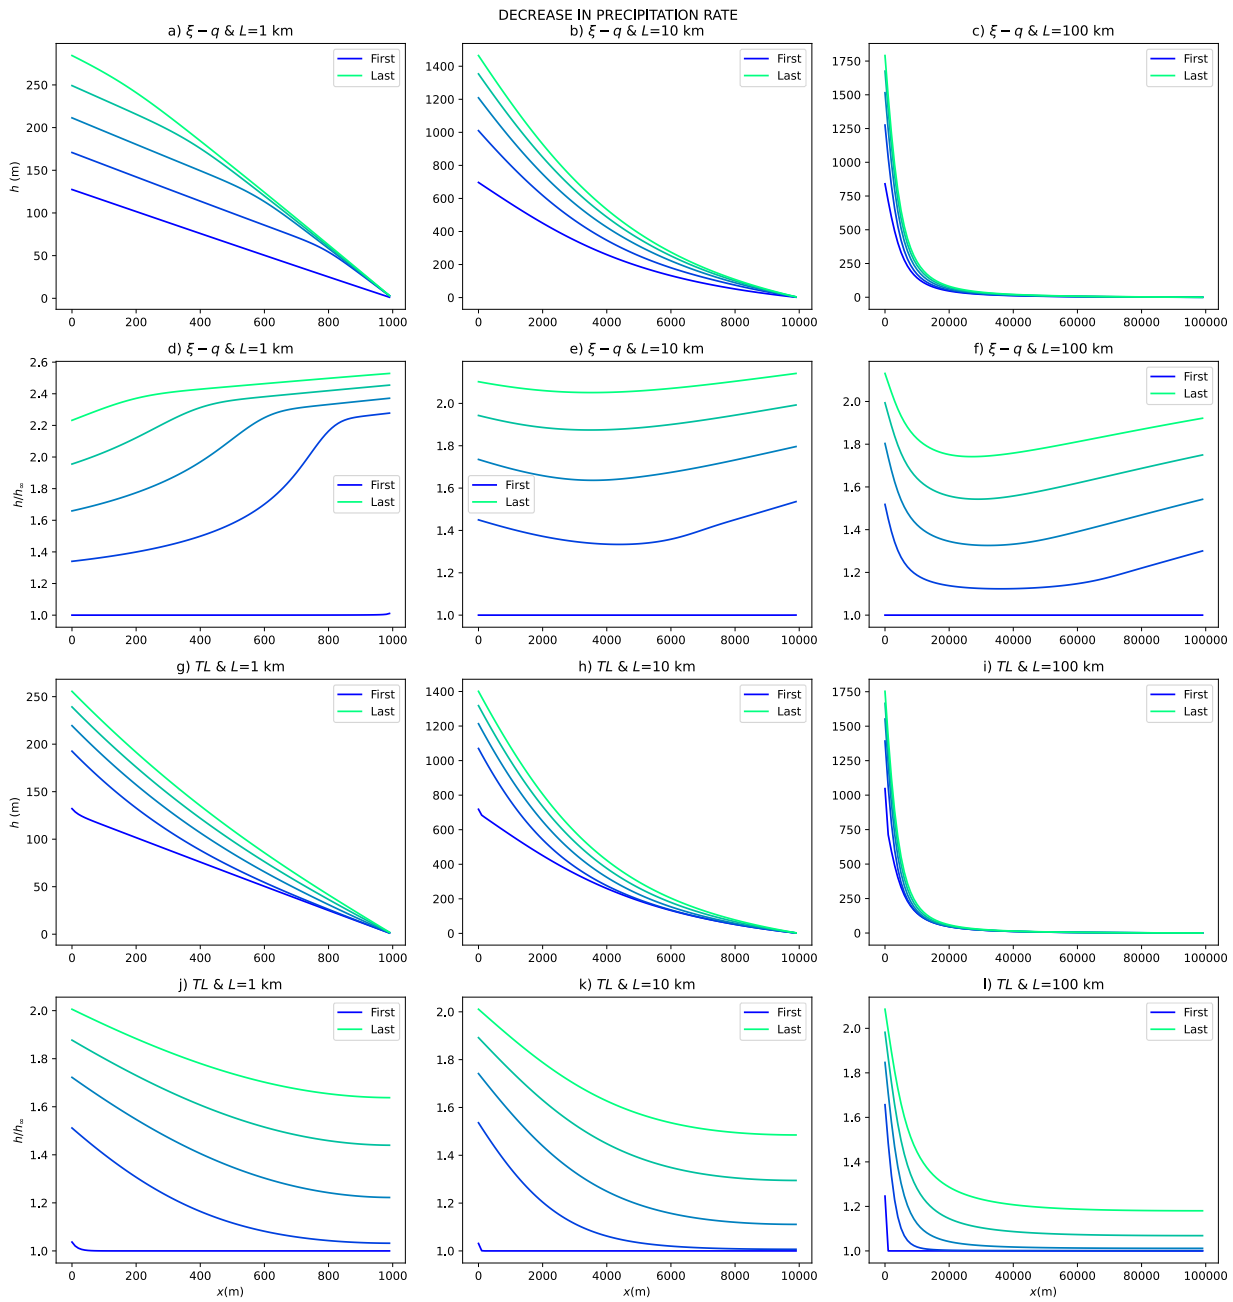

Figure S3: Same as Figure 9 but for a decrease in relative precipitation rate by a factor of 2.
